# Supplementary material for: Archaeology and contemporary death: Using the past to provoke, challenge and engage
Source: PLOS journal article supplement (doi:10.1371/journal.pone.0244058), 2020-12-29
Supplement: S1 (10.1371/journal.pone.0244058.s001) [file journal.pone.0244058.s001]

Table S1: Workshop case studies

| Workshop Theme (set 1)         | Station sub-theme                             | Case study                                                                                                  |
|--------------------------------|-----------------------------------------------|-------------------------------------------------------------------------------------------------------------|
| Memorialisation and Legacy     | What will survive of us?                      | Rameses II (Luxor, Egypt; 1303–1213 BC)                                                                     |
|                                |                                               | <i>Ozymandias</i> by Percy Shelley (1818)                                                                   |
|                                | Drawing on traditions of the past             | The Long Barrow at All Cannings (Devizes, UK; modern)                                                       |
|                                |                                               | Illingworth Mausoleum, Undercliffe Cemetery (Bradford, UK; 19 <sup>th</sup> century)                        |
|                                | Place and community                           | Sealer's Cemetery (Upernavik, Greenland; 20 <sup>th</sup> century to modern)                                |
|                                |                                               | Poet's Corner, Westminster Abbey (London, UK; 14 <sup>th</sup> century to present)                          |
|                                | Bones, art and destiny                        | Capella dos Ossos (Évora, Portugal; 16 <sup>th</sup> century)                                               |
|                                | Power and politics: the body beyond the grave | St. Valerius (Weyarn, Germany; 16 <sup>th</sup> century to present)                                         |
|                                |                                               | Holy Right Hand of St. Stephen (Budapest, Hungary; 11 <sup>th</sup> century to present)                     |
|                                |                                               | Jeremy Bentham (London, UK; 19 <sup>th</sup> century)                                                       |
| Age and circumstances of death | Untimely and violent deaths                   | Tollund Man (Denmark; 4 <sup>th</sup> century BC) and Lindow Man (Cheshire, UK; 1 <sup>st</sup> century AD) |
|                                |                                               | Flowers for Princess Diana (Kensington Palace, UK; 1997)                                                    |
|                                |                                               | Khmer Rouge <i>Killing Fields</i> (Cambodia; 1975–9 to present)                                             |
|                                |                                               | 'Ghost bike' memorial (New York, USA; 2007)                                                                 |
|                                | Infant deaths                                 | Infant cemetery at Garton Slack (Yorkshire, UK; 3 <sup>rd</sup> -2 <sup>nd</sup> centuries BC)              |
|                                |                                               | Infant on swan's wing (Vedbaek, Denmark; c. 4000 BC)                                                        |
|                                |                                               | Mummified foetus (Giza, Egypt; 7 <sup>th</sup> -6 <sup>th</sup> centuries BC)                               |
|                                | Caring for the elderly and infirm in the past | Hohokam woman at La Plaza (Arizona, USA; 13 <sup>th</sup> century AD)                                       |
|                                |                                               | Shanidar Cave 1, Iraq (35,000-65,000 BP)                                                                    |
|                                |                                               | Burial 9 at Man Bac, Vietnam (c. 2000 BC)                                                                   |
|                                |                                               | The Vix Princess (Burgundy, France; c. 500BC)                                                               |
| Images of the dead             | Frozen in time                                | Mummified from Thebes (Egypt; 1 <sup>st</sup> century AD)                                                   |
|                                |                                               | Photo of young female on grave at Highgate Cemetery (London, UK; 2016)                                      |
|                                |                                               | Facebook legacy page of Anthony Dowdell (online; died 2012)                                                 |
|                                | Portraits of the dead                         | Death portrait of young woman with parents (unknown provenance; 19 <sup>th</sup> century)                   |
|                                |                                               | The 'transi' statue of René de Chalon at Saint-Étienne church (France; 16 <sup>th</sup> century)            |
|                                |                                               | Death-mask of Tutankhamun (Egypt; 1341–1323BC)                                                              |
|                                |                                               | Mummified remains of Torajan Cristina Banne (Indonesia; died 2011, image 2016)                              |
|                                | Gristhorpe Man<br>(*includes object handling) | *3D print of skull of Gristhorpe Man (Scarborough, UK; c. 2000 BC)                                          |
|                                |                                               | *Facial reconstruction of Gristhorpe Man (Scarborough, UK; c. 2000BC)                                       |

|           |                                                  |                                                                                                                            |
|-----------|--------------------------------------------------|----------------------------------------------------------------------------------------------------------------------------|
|           |                                                  | Magazine article showing CT scanning of Gristhorpe Man at Bradford Royal Infirmary                                         |
| Ancestors | Binding forces: communal ancestors               | Composite skeleton from Cladh Hallan (South Uist, UK; c. 1600–1300BC)                                                      |
|           |                                                  | Plastered skulls (Tell Aswad, Syria; c. 7500BC)                                                                            |
|           |                                                  | Dinner service <i>Nourish</i> , glazed using 200 powdered human bones (USA; 2015)                                          |
|           | Lines through the past: ancestors as individuals | Richard III and descendants Michael Ibsen and Wendy Duldig (UK, Canada and Australis; fifteenth century to present)        |
|           |                                                  | Painted skulls at the Beinhaus ('Bone House'), St. Michael's Chapel (Hallstatt, Austria; 18 <sup>th</sup> century to 1995) |
|           |                                                  | Video of Malagasy <i>Famadihana</i> festival (Madagascar; 17 <sup>th</sup> century to present)                             |
|           | Ancestral places                                 | <i>Moa</i> i statues (Easter Island (Rapa Nui); 1 <sup>st</sup> millennium AD)                                             |
|           |                                                  | Cranial fragment and curated gaming piece in House 4 at Broxmouth (East Lothian, UK; 1 <sup>st</sup> century BC/AD)        |
|           |                                                  | Stonehenge and Woodhenge (Wiltshire, UK; c. 2300BC)                                                                        |

| Workshop Theme (set 2) | Station sub-theme                                         | Case study                                                                                                                                                            |
|------------------------|-----------------------------------------------------------|-----------------------------------------------------------------------------------------------------------------------------------------------------------------------|
| Place                  | Changing places: laying the dead to rest                  | Reburial of Richard III (1452-1485) (Leicester Cathedral, UK; 26 <sup>th</sup> March 2015)                                                                            |
|                        | Place of death                                            | The apartment and possessions of Emma Morano, who died aged 117 (Italy; 15 <sup>th</sup> April 2017)                                                                  |
|                        |                                                           | The Sculptor's Cave funerary site (Scotland, UK; 11 <sup>th</sup> -9 <sup>th</sup> centuries BC and 3 <sup>rd</sup> century AD)                                       |
|                        | Place of burial                                           | Sealer's Cemetery (Upernavik, Greenland; 20 <sup>th</sup> century to modern) ( <i>duplicate case study</i> )                                                          |
|                        | Episodic places<br>(*includes audiovisual content)        | *Child dressed up at the Day of the Dead festivities (Oaxaca, Mexico; present day)                                                                                    |
|                        |                                                           | *Villagers lighting candles in a cemetery for the Day of the Dead (Oaxaca, Mexico; present day)                                                                       |
|                        |                                                           | *Monarch butterflies emerging from hibernation (occurs around the same time as the Day of the Dead) (mountains of Central Mexico; present day)                        |
| Legacy                 | Physical legacies                                         | Dani tribe chief Eli Mabel holding the smoked and mummified body of his 250-year-old ancestor Agat Mamete Mabel (West Papua; present day)                             |
|                        | Reinvigorated legacies<br>(*includes audiovisual content) | *Digitally coloured photos of seminal moments in history by Marina Amaral, e.g. American troops on Omaha Beach on D-Day (various locations; 19 <sup>th</sup> century) |
|                        | Complicated legacies                                      | Reburial of Richard III (1452-1485) (Leicester Cathedral, UK; 26 <sup>th</sup> March 2015) ( <i>duplicate case study</i> )                                            |
| Objects                | Heirlooms                                                 | Molnik belt plate showing evidence for breakage, repair and reuse (Ljubljana, Slovenia; 6 <sup>th</sup> century BC)                                                   |

|                       |                                                        |                                                                                                                                                                                       |
|-----------------------|--------------------------------------------------------|---------------------------------------------------------------------------------------------------------------------------------------------------------------------------------------|
|                       |                                                        | Necklace from the Queen's Barrow, Arras, which comprises c. 100 glass beads from potentially 5 different necklaces (Yorkshire, UK; 400-200 BC)                                        |
|                       | Human remains as objects                               | Spindlewhorl from Crosskirk brooch, thought to have been fashioned from a human femur (Scotland, UK; cal AD 130-340)                                                                  |
|                       |                                                        | An example of a carved and painted human mandible which may have been worn as a pendant (Dainzú-Macuilxóchitl, Mexico; c. AD 700)                                                     |
|                       |                                                        | Pope Francis kissing vial of blood belonging to Saint Januarius (Vatican; 2016)                                                                                                       |
|                       | Grave goods<br>(*includes object handling)             | An adult female buried with a labret and pottery vessels (Sabi Abyad, Syria; c. 6000 BC)<br>*Replica pots from graves of adults and children (Khok Phanom Di, Thailand; 2000-1500 BC) |
| Treatment of the Dead | Scattered and invisible                                | The Sculptor's Cave (Scotland, UK; 11 <sup>th</sup> -9 <sup>th</sup> centuries BC and 3 <sup>rd</sup> century AD) ( <i>duplicate case study</i> )                                     |
|                       | Preserving the body<br>(*includes audiovisual content) | *Description of the Egyptian mummification process (Egypt; c. 1550-50 BC)                                                                                                             |
|                       |                                                        | Facemask of mummified Roman Herakleides (Egypt; AD 50-100)                                                                                                                            |
|                       |                                                        | Scene (from Book of the Dead) of Anubis preparing a mummy in the tomb of Pharaohs Twosret and Setnakhte (Valley of the Kings, Egypt; 12 <sup>th</sup> century BC)                     |
|                       | Recreating faces<br>(*includes audiovisual content)    | Plastered skull, CT scan and facial reconstruction of individual (Jericho, Palestine; 8000-7500 BC)                                                                                   |
|                       |                                                        | *Interview with Alexandra Fletcher, British Museum about the analysis of the plastered skull (London, UK; present day)                                                                |
